# Supplementary material
Source: PubMed Central journal article supplement (PMC11027824)
Supplement: 262_2019_2453_MOESM1_ESM.pdf [file 262_2019_2453_MOESM1_ESM.pdf]

**Supplemental Table 1: Excluded studies identified by systematic search**

| Excluded studies    | Reason excluded                                              |
|---------------------|--------------------------------------------------------------|
| Khan[43]            | HR for OS and/or PFS not available                           |
| Galli[39]           | HR for OS and/or PFS not available                           |
| Agarwal[44]         | Possible error in available HR for OS, and PFS not available |
| Megtes[45]          | HR for OS and/or PFS not available                           |
| Spackowicz[46]      | HR for OS and/or PFS not available                           |
| Wang[47]            | HR for OS and/or PFS not available                           |
| Kapoor[48]          | HR for OS and/or PFS not available                           |
| Kaderbhai[9]        | These patients are included in Routy et al                   |
| Weinstock[11]       | Re-analysis of RCT data (not an observational study)         |
| Chalabi[12]         | Re-analysis of RCT data (not an observational study)         |
| Derosa 2017 #1 [49] | Conference abstract, data included in Derosa et al[7]        |
| Derosa 2018[50]     | Conference abstract, data included in Derosa et al[7]        |
| Derosa 2017 #2[51]  | Conference abstract, data included in Derosa et al[7]        |
| Zhao[52]            | Conference abstract, data included in Zhao et al[23]         |
| Huemer 2018[14]     | Duplicate data from Huemer et al 2019[5]                     |

RCT = Randomised controlled trial

**Supplemental Table 2: Results of multivariate analysis by cohort**

| Cohort                 | Multivariate analysis performed                                | Adjusted HR for PFS and/or OS where available                                         | Other variables included in adjusted multivariate model                                                                           |
|------------------------|----------------------------------------------------------------|---------------------------------------------------------------------------------------|-----------------------------------------------------------------------------------------------------------------------------------|
| <b>Group 1 Cohorts</b> |                                                                |                                                                                       |                                                                                                                                   |
| Derosa-RCC[7]          | Yes<br>OS not significant<br><br>PFS remained significant      | HR OS 2.1 (0.9 – 5.0, p=0.11)<br><br>HR PFS 2.2 (1.3-3.3, p<0.01)                     | IMDC risk group, tumor burden<br><br>Tumor burden                                                                                 |
| Derosa-NSCLC[7]        | Yes<br>OS remained significant<br><br>PFS not significant      | HR OS 2.5 (1.6-3.7, p<0.01)<br><br>HR PFS 1.3 (0.0-1.8, p=0.17)                       | Number of prior regimens, ECOG, clinical trial<br><br>Smoking status, number of prior regimens, ECOG, clinical trial              |
| Elkrief[8]             | Yes<br>OS not significant<br>PFS remained significant          | HR OS 2 (0.83 – 4.8, p=0.13)<br><br>HR PFS 3.1 (1.2 – 7.7, p=0.02)                    | Age, ECOG, sex, LDH, BRAF status, treatment line, type of ICB                                                                     |
| Pinato[16]             | Yes<br>OS remained significant<br>PFS not given                | HR OS 3.4 (1.9-6.1, p<0.001)                                                          | Not specified                                                                                                                     |
| Sen[19]                | No                                                             |                                                                                       |                                                                                                                                   |
| Thompson[22]           | Yes<br>OS remained significant<br>PFS remained significant     | HR OS 3.5 (95% CI not given, p = 0.004)<br><br>HR PFS 2.5 (95% CI not given, p=0.02)  | Age, sex, race, tobacco history, tumour histology, presence of brain metastases, prior radiotherapy                               |
| Zhao[23]               | Yes<br>OS remained significant<br>PFS remained significant     | HR OS 2.8 (1.3 – 6.2, p=0.009)<br><br>HR PFS 3.4 (1.8 – 6.7, p=0.003)                 | Smoking (PFS only), ECOG, histology, treatment line, clinical trial                                                               |
| <b>Group 2 Cohorts</b> |                                                                |                                                                                       |                                                                                                                                   |
| Ahmed[6]               | Yes<br>OS remained significant<br>PFS not given                | HR OS not given, p=0.038                                                              | age                                                                                                                               |
| Hakozaki[41]           | Yes<br>OS not significant<br>PFS not given                     | HR OS 2.02 (0.7 – 5.83, p=0.19)                                                       | ECOG, driver mutations, use of proton-pump inhibitors/ histamine blockers                                                         |
| Huemer[14]             | Yes<br>OS remained significant<br><br>PFS remained significant | HR OS 14.81 (95% CI not given, p=0.026)<br><br>HR PFS 5.4 (95% CI not given, p=0.028) | Age, sex, type of ICB, EGFR mutation, ALK mutation, number of prior lines of therapy, PD-L1 status, immune related adverse events |
| Huemer - Salzburg[5]   | No                                                             |                                                                                       |                                                                                                                                   |
| Huemer -Linz [5]       | No                                                             |                                                                                       |                                                                                                                                   |
| Lalani[26, 42]         | Yes<br>OS not significant<br>PFS remained significant          | HR OS 1.44 (0.755 – 2.77, p=0.27)<br><br>HR PFS 1.96 (1.2 – 3.2, p=0.007)             | Adjusted for prognostic factors including risk groups, no further details given                                                   |
| Mielgo-Rubio[20]       | No                                                             |                                                                                       |                                                                                                                                   |
| Routy-NSCLC[13]        | Yes<br>OS remained significant<br>PFS not given                | HR OS 2.21 (1.3-3.7, p=0.004)                                                         | Age, sex, histology, smoking status, number of prior lines of systemic therapy, number of metastatic sites, ECOG                  |

|                        |                                                 |                                                                   |                                                                          |
|------------------------|-------------------------------------------------|-------------------------------------------------------------------|--------------------------------------------------------------------------|
| Routy-Urothelial[13]   | Yes<br>OS not given<br>PFS not significant      | HR PFS 1.96 (0.91 0 4.23, p=0.09)                                 | Haemoglobin,<br>performance status, liver<br>metastases                  |
| Schett[24]             | Yes<br>OS remained significant<br>PFS not given | HR OS 2.8 (1.7 – 4.5, p<0.001)                                    | ECOG, prior radiotherapy,<br>histology                                   |
| Tinsley[25]            | Yes<br>OS remained significant                  | HR OS 1.47 (1.038 – 2.107, p=0.033)                               | Comorbidities, on clinical<br>trial, number of metastatic<br>sites, ECOG |
|                        | PFS remained significant                        | HR PFS 1.4 (1.028 – 1.92, p=0.033)                                | Comorbidities, ECOG                                                      |
| <b>Group 3 Cohorts</b> |                                                 |                                                                   |                                                                          |
| Do[17]                 | No                                              |                                                                   |                                                                          |
| Hemadri[21]            | No                                              |                                                                   |                                                                          |
| Kulkarni-NSCLC[15]     | Yes<br>OS not given<br>PFS remained significant | HR PFS remained significant after<br>adjustment, values not given | Not given                                                                |
| Kulkarni-RCC[15]       | Yes<br>OS not given<br>PFS remained significant | HR PFS remained significant after<br>adjustment, values not given | Not given                                                                |
| Masini[18]             | No                                              |                                                                   |                                                                          |

IMDC = International Metastatic RCC Database Consortium

EGFR = Epidermal Growth Factor Receptor

ALK = anaplastic lymphoma kinase

LDH = Lactate Dehydrogenase

## Supplemental Figure 1: Search Strategy

1. exp malignant neoplasm/ or exp neoplasm/
2. cancer.mp
3. 1 or 2
4. Immunotherapy/ or active immunotherapy/ or adaptive immunotherapy/ or cancer immunotherapy/
5. programmed death 1 ligand 1/
6. programmed death 1 receptor/
7. cytotoxic T lymphocyte antigen 4/
8. immune checkpoint blocking agent.mp
9. pembrolizumab/
10. ipilimumab/
11. atezolizumab/
12. durvalumab/
13. nivolumab/
14. avelumab/
15. 4 or 5 or 6 or 7 or 8 or 9 or 10 or 11 or 12 or 13 or 14
16. exp antibiotic agent
17. cohort analysis/
18. observational study/
19. retrospective study/
20. 17 or 18 or 19
21. 3 and 15 and 16 and 17
22. Limit 21 to human

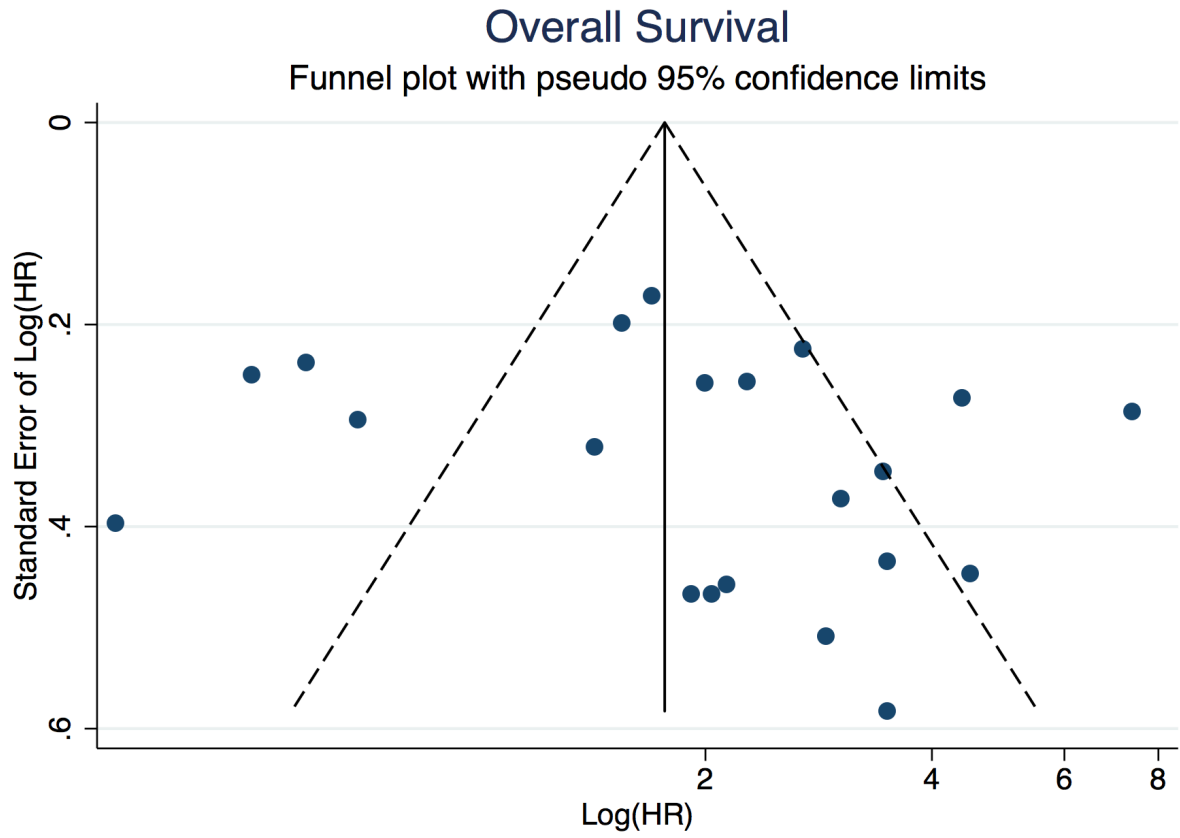

Supplemental Figure 2: Funnel plot for overall survival

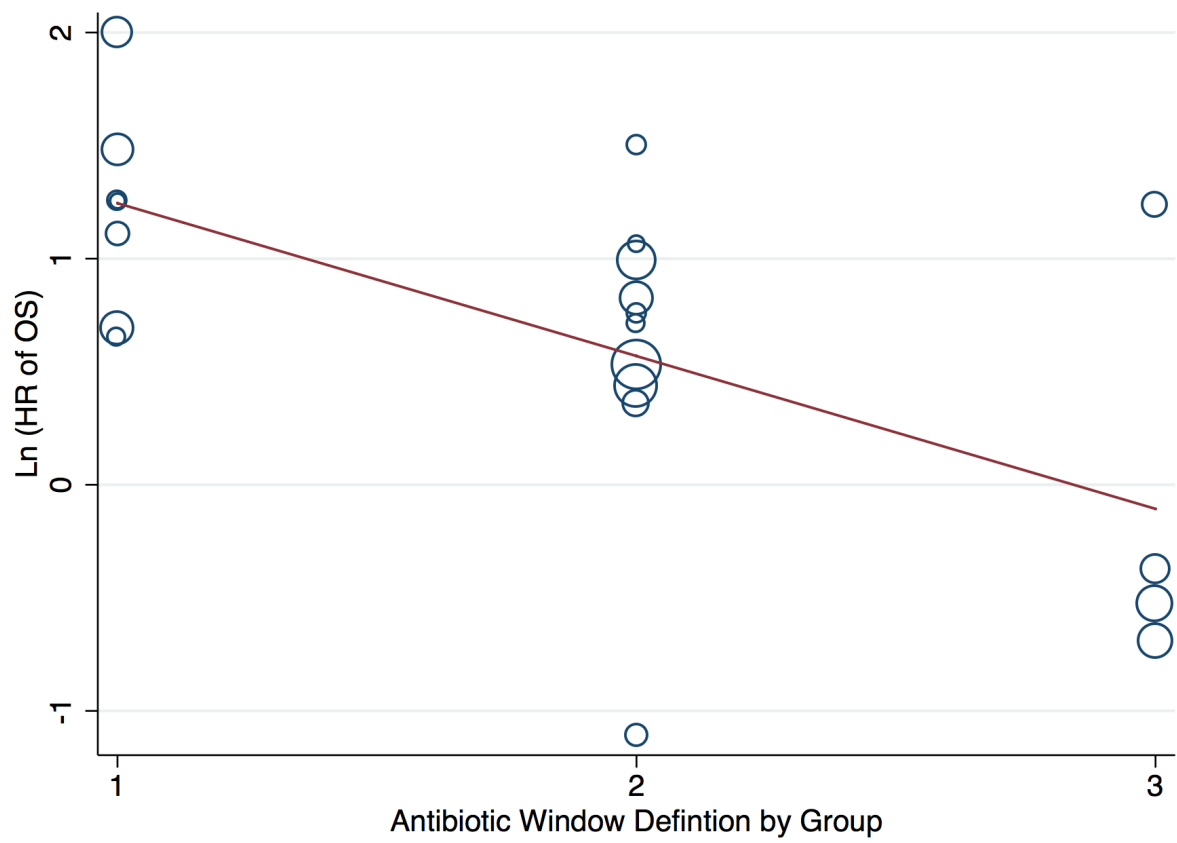

**Supplemental Figure 3: Meta-regression of overall survival and antibiotic window by cohort**

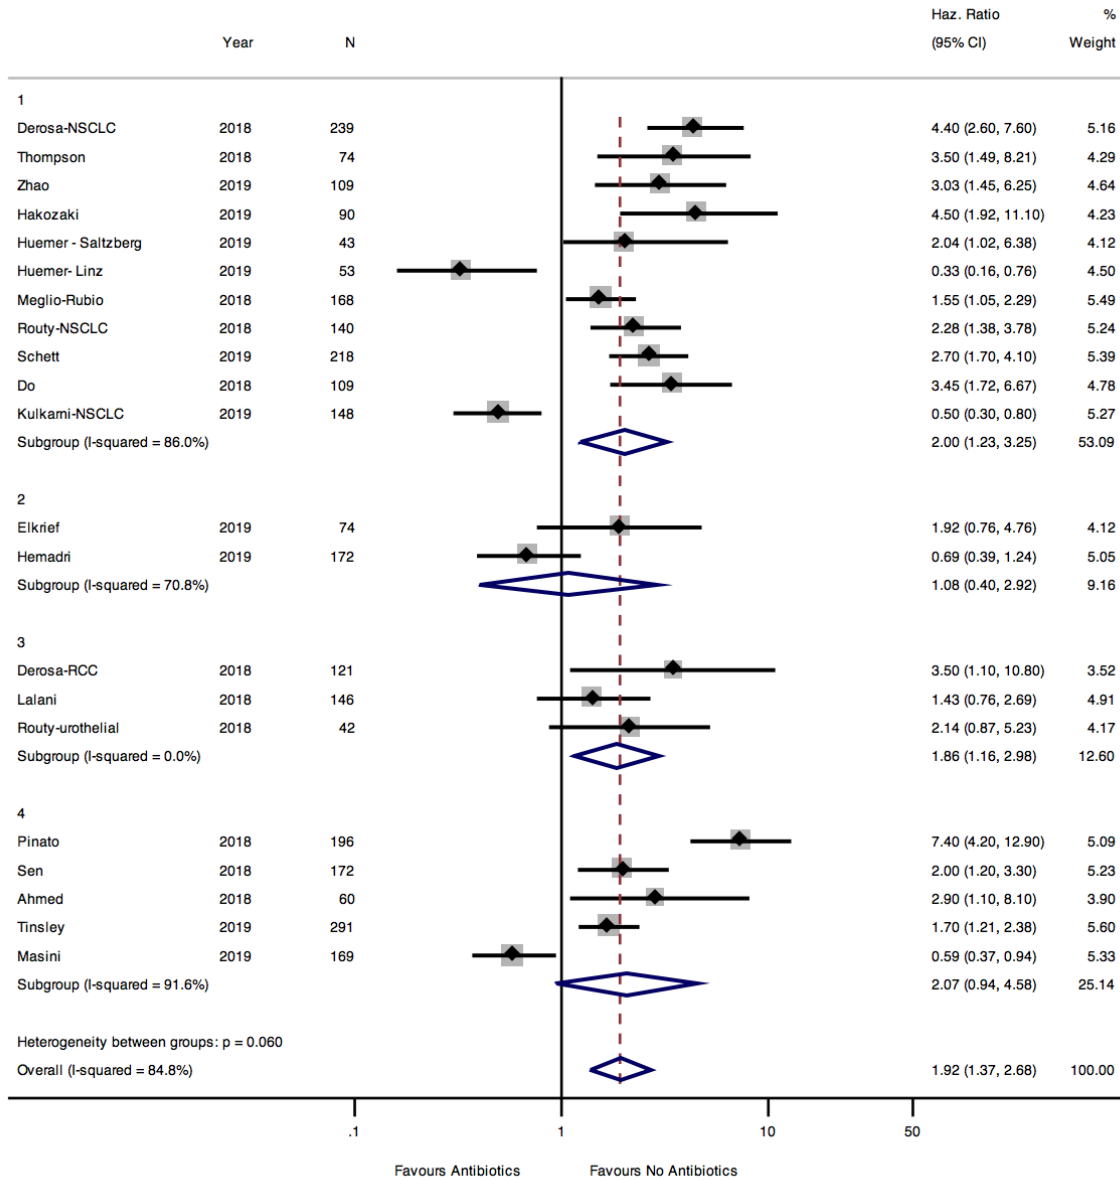

NOTE: Weights are from random-effects model

**Supplemental Figure 4: Pooled hazards ratio for overall survival among those exposed and unexposed to antibiotics stratified by type of malignancy**

- Group 1: NSCLC
- Group 2: Melanoma
- Group 3: RCC/Urothelial cancer
- Group 4: Studies with mixed tumour types

# Progression Free Survival

Funnel plot with pseudo 95% confidence limits

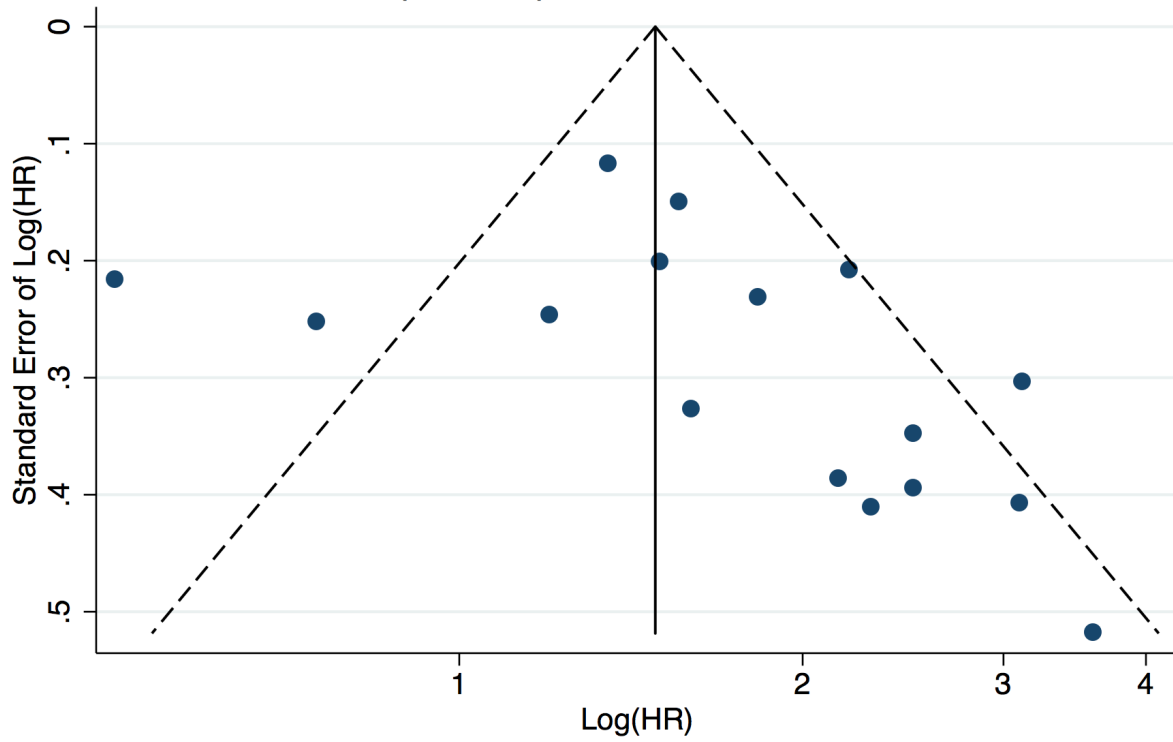

Supplemental Figure 5: Funnel plot for progression free survival



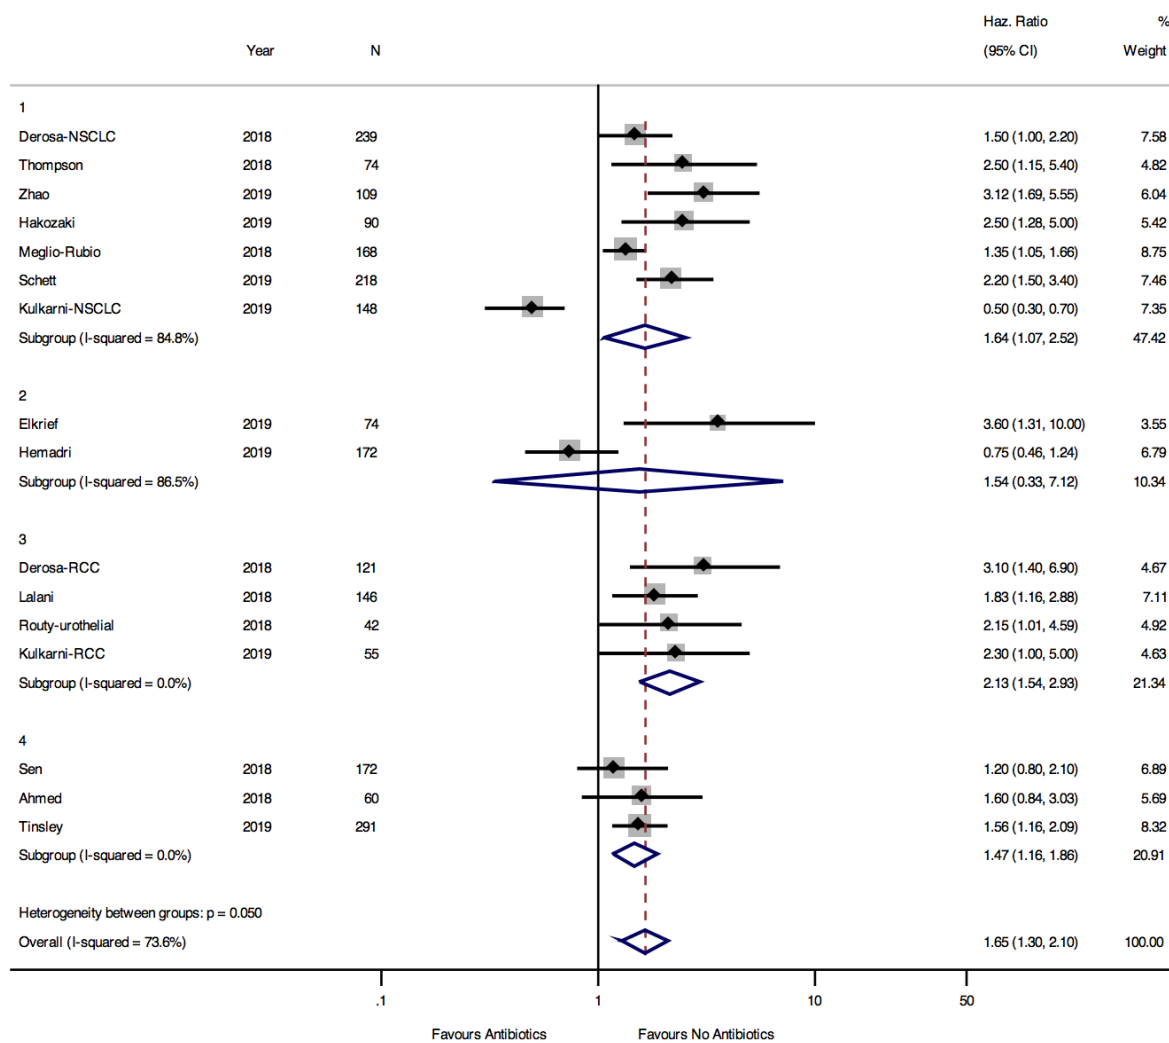

NOTE: Weights are from random-effects model

### Supplemental Figure 6: Pooled hazards ratio for progression free survival among those exposed and unexposed to antibiotics stratified by type of malignancy

Group 1: NSCLC

Group 2: Melanoma

Group 3: RCC/Urothelial cancer

Group 4: Studies with mixed tumour types
